---

# 4D RECONSTRUCTION OF DEVELOPMENTAL TRAJECTORIES USING SPHERICAL HARMONICS

---

Giovanni Dalmaso<sup>1,\*</sup>

Marco Musy<sup>1</sup>

Martina Niksic<sup>2</sup>

Alexandre Robert-Moreno<sup>1</sup>

Claudio Badía-Careaga<sup>3</sup>

Juan J. Sanz-Ezquerro<sup>3,4</sup>

James Sharpe<sup>1,5,\*</sup>

December 16, 2021

<sup>1</sup> European Molecular Biology Laboratory (EMBL-Barcelona), Barcelona, Spain

<sup>2</sup> Centre for Genomic Regulation (CRG), Barcelona, Spain

<sup>3</sup> Centro Nacional de Investigaciones Cardiovasculares (CNIC), Madrid, Spain

<sup>4</sup> Centro Nacional de Biotecnología (CSIC Madrid), Madrid, Spain

<sup>5</sup> Institució Catalana de Recerca i Estudis Avançats (ICREA), Barcelona, Spain

\*Correspondence: [giovanni.dalmaso@embl.es](mailto:giovanni.dalmaso@embl.es) (GD), [james.sharpe@embl.es](mailto:james.sharpe@embl.es) (JS)

## Summary

Although the full embryonic development of species such as *Drosophila* and zebrafish can be 3D imaged in real time, this is not true for mammalian organs, as normal organogenesis cannot be recapitulated *in vitro*. Currently available 3D data is therefore *ex vivo* images which provide only a snap shot of development at discrete moments in time. Here we propose a computer-based approach to recreate the continuous evolution in time and space of developmental stages from 3D volumetric images. Our method uses the mathematical approach of spherical harmonics to re-map discrete shape data into a space in which facilitates a smooth interpolation over time. We tested our approach on mouse limb buds (from E10 to E12.5) and embryonic hearts (from 10 to 29 somites). A key advantage of the method is that the resulting 4D trajectory takes advantage of all the available data (i.e. it is not dominated by the choice of a few “ideal” images), while also being able to interpolate well through time intervals for which there is little or no data. This method not only provides a quantitative basis for validating predictive models, but it also increases our understanding of morphogenetic processes. We believe this is the first data-driven quantitative 4D description of limb morphogenesis.

**Keywords** Spherical Harmonics · Mouse Development · Limb Growth · Heart Growth · Morphogenesis · OPT · Voxel Data

## 1 Introduction

Progress in imaging technology has been central to understanding morphogenesis, which is an intrinsically 3D and dynamical process. In the case of externally developing organisms, such as *Drosophila* and zebrafish, it is now possible to image *in vivo* whole-embryo development at a cellular level, up to and including the later organ-forming stages (Tomer et al. 2012, Royer et al. 2016). However, for more complex animal models (e.g. mouse embryogenesis), it is still not possible to observe organogenesis in real time, due to the limitations of *in vitro* culture techniques. The dynamics of early post-implantation mouse embryogenesis have been successfully imaged in great detail (McDole et al. 2018), however embryo culture beyond E10.5 is not robust enough to recapitulate the full development of complex organs - largely due to the lack of blood flow. *In vivo/in utero* imaging techniques (such as MRI) do not yet provide sufficient spatial resolution to capture the morphogenesis of organs, and our understanding of complex mammalian organogenesis is therefore largely derived from capturing series of *ex vivo* and static 3D images, often using mesoscopic imaging techniques such as optical projection tomography (Sharpe et al. 2002) (Figure 1A), light sheet imaging (Huisken et al. 2004), or *ex vivo* MRI (Wong et al. 2012, 2014).

14 An important remaining challenge is to integrate these series of static 3D data-sets into a smooth, continuous and 4D  
15 trajectory that realistically models the morphogenesis of the organ in question. There have been diverse attempts to  
16 recapitulate the development of a full mouse embryo. Among others, [Wong et al. \(2015\)](#), used 3D OPT images taken at  
17 six developmental time points (between E11.5 and E14.0), to create a 4D model of mouse embryo growth. Specifically,  
18 the outcome was the result of spline fitting and interpolating over time the displacement vectors of homologous points  
19 of the 3D voxel images. While this model provided a global overview of mouse embryo development, it was not able to  
20 accurately recreate smooth shape trajectories for all the organs. In particular, registration of the voxel data was not  
21 able to align parts of the embryo whose positions are intrinsically variable over time, such as the limbs and the tail.  
22 Therefore, this method was not able to precisely reproduce the development of these particular mouse's structures ([Wong  
23 et al. 2015](#)). Indeed, the large degree of natural variation in samples represents indeed a key challenge in the effort of  
24 recapitulating the growth of a mouse embryo or even a sub-part of it such as the limb.

25 Two embryos at the exact same age do not look identical, due to the intrinsic variation both in shape and in development.  
26 We therefore ideally need a technique which, on the one hand can take advantage of as much shape data as possible,  
27 while at the same time not giving excessive weight to any specific individual. In practice this means a procedure in  
28 which each sample (i.e. each real limb) is able to influence the mean trajectory at ages both younger and older than  
29 itself. Or in other words, the final reconstruction needs to capture the right balance between the overall shape trends  
30 across the whole data-set, and the actual details of each limb. Another challenge is that the shape complexity of an  
31 organ increases during development. We need a method that performs some degree of dimensionality reduction, but  
32 without losing the more complex features of the older stages.

33 Spherical harmonics have been known since 1782 (Laplace - *Mécanique Céleste*) and form a natural basis for describing  
34 how a scalar quantity varies on the surface of a sphere. They produce an orthogonal basis for mathematically describing  
35 a 3D shape and provide a compact parametric representation of it. Spherical harmonics have been widely used in  
36 different fields and, in recent years, also in biology. One of their main use has been to characterize, among others,  
37 the shapes of cells and organs ([Styner et al. 2006](#), [Morishita et al. 2017](#), [Medyukhina et al. 2020](#)), deformations  
38 and movements of tissues in an easier and more robust way ([Khairy et al. 2018](#)). Moreover, spherical harmonics  
39 expansion has been also applied to mesh refinements ([Lai et al. 2009](#)). The expansion of a function in spherical  
40 harmonics is characterized by a finite set of coefficients which multiply the set of functions constituting the orthogonal  
41 basis. These coefficients encode the information of the original function, therefore, the higher the order (i.e. the  
42 number of coefficients used) the better the representation. Among other properties, one important feature that makes  
43 spherical harmonics particularly convenient is that the information encoded in the coefficients decreases with their  
44 order. Therefore, limiting the number of coefficients of the series will not cause a loss of the main characteristic of the  
45 shape represented. Previous studies using spherical harmonics have considered collections of objects (both surfaces or  
46 volumes) often analysed for the purpose of quantifying the differences or similarities between the sets. We therefore  
47 propose and demonstrate an approach to describe the evolution in time and space of mouse limbs both from volumetric  
48 and surface data. We are only aware of one previous use of spherical harmonics to characterise a changing morphology  
49 over time - in the chick embryo ([Morishita et al. 2017](#)), and believe this is the first application to a mammalian organ.

50 A 2D trajectory of limb bud shape change has previous been created (not using spherical harmonics), and has been  
51 developed into a method to estimate the embryonic stage of a limb bud to a high temporal resolution ([Musy et al. \(2018\)](#),  
52 [Figure 1B](#)). This work, although only in 2D, allows us to have a reference to align in space and time mouse embryos  
53 according to a chosen limb ([Figure 1C, E](#)). Here we develop and demonstrate two different versions of this approach  
54 for the case of limb development. We believe this approach has widespread applicability in developmental biology, to  
55 provide a quantitatively reliable baseline description of organ development - something surprisingly absent in the field  
56 so far - and so we also demonstrate its use on 3D images of another mouse organ, the developing heart.

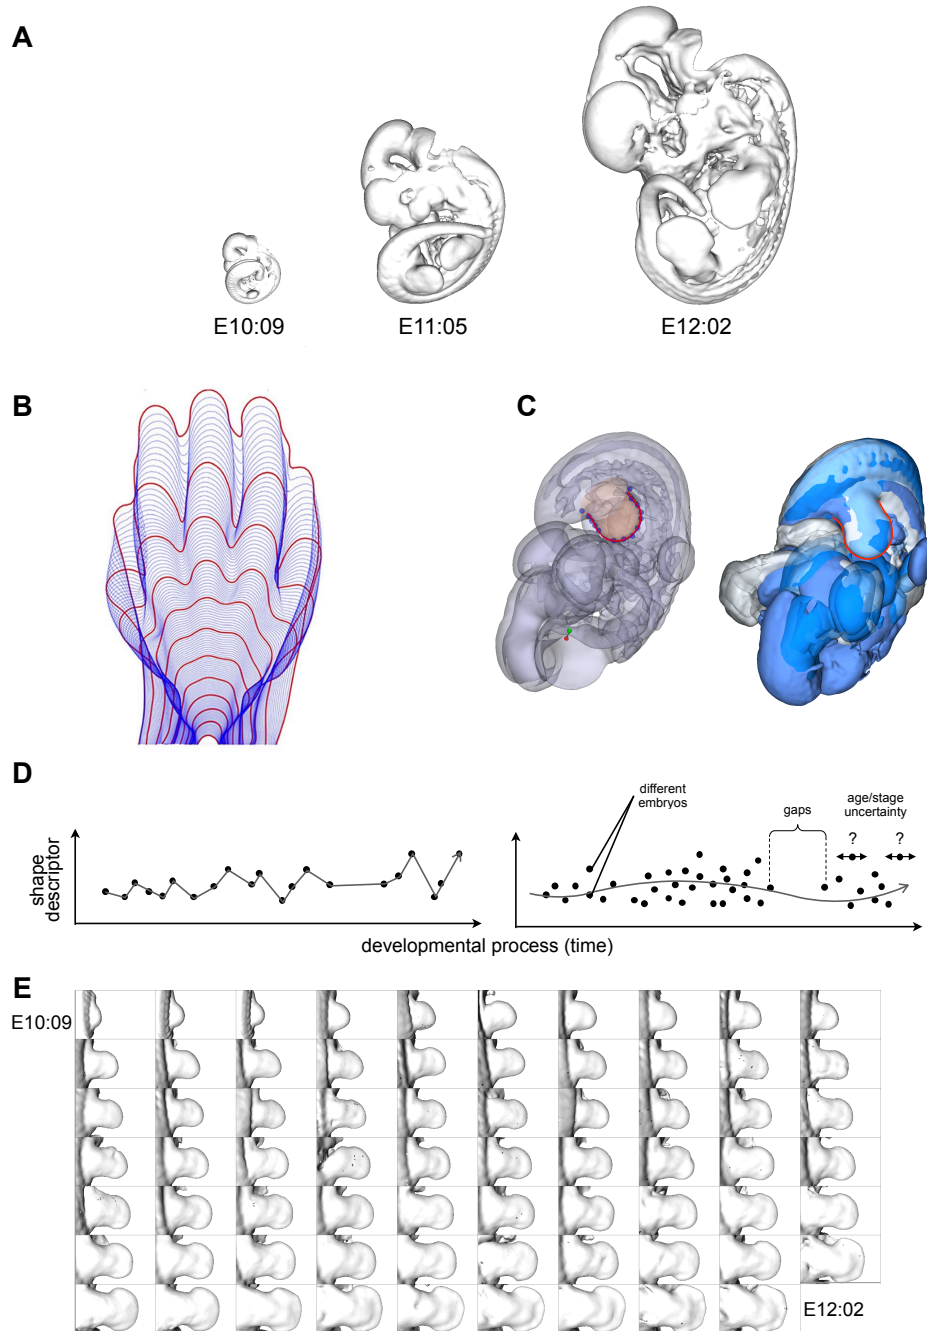

**Figure 1:** **A** - Three mouse embryos at different developmental stages (E10:09, E11:05, E12:02). **B** - Two dimensional interpolation of one mouse limb reference shape to the next in the time sequence. The red lines indicate the shapes that correspond to the experimental averages for each age group (from Musy et al. (2018)). **C** - Alignment of three embryos at the same developmental stage according to their right hind limbs shown with transparency (left) and as surface in solid color (right). The red line represents the output of the staging system (Musy et al. 2018). **D** - Graphical illustration of a naive linear based interpolation (left plot) versus a smooth trajectory of the data set (right plot). **E** - Data set of mouse right hind limbs used in this study ordered according to their developmental stage from E10:09 to E12:02.

## 57 2 Results

58 One key step in spherical harmonics expansion is to first map a surface onto a sphere. In the case of relatively simple  
 59 surfaces, one possible solution is using as mapping the geometrical distance between the surface considered and a  
 60 sphere which contains it. Specifically, all these distances represent a set of scalars onto the sphere which serve as a  
 61 mapping that can subsequently be expanded in spherical harmonic. We applied this procedure to 69 surfaces of mouse  
 62 limb buds imaged using optical projection tomography (OPT) of mouse embryos previously ordered in time using the  
 63 embryonic Mouse Ontogenetic Staging System (eMOSS). Expanding a function into a spherical harmonic series and  
 64 reconstructing it from the spherical harmonic coefficients are the two essential procedures applied when operating with  
 65 data on the sphere. However, in our work, instead of using the exact coefficients' values of the spherical harmonic series  
 66 for reconstructing the original function, we interpolate them in time. In this way, the interpolation not only provides a  
 67 spatial average estimate in the points where there are more than one surface but it also produces a temporal estimate for  
 68 the existent gaps due to missing data. The results is a reconstruction describing a continuous and smooth changing  
 69 shape over space and time.

### 70 2.1 Application on simple surfaces

71 An arbitrary surface, which can be mapped onto a sphere, can be expanded into a finite series of spherical harmonic  
 72 terms and reconstructed back. The precision by which the reconstructed surface will resemble the original one depends  
 73 on the number of coefficients of the expansion, the higher the number of coefficients the more precise the reconstruction.

74 As a data set, we used a collection of mouse embryos polygonal surfaces extracted from OPT scans (Sharpe et al. 2002).  
 75 All the embryos were staged, using the staging system already described, in order to be correctly positioned in time. We  
 76 then focused on the right hind limbs obtaining a set of 69 limbs from E10:09 to E12:22 (Figure 1D).

77 The embryonic Mouse Ontogenetic Staging System (eMOSS) (Musy et al. 2018) provides us with a reference to align  
 78 in space the limb buds. Afterwards, the alignment of the sequence of limbs was refined using the iterative closest point  
 79 (ICP) algorithm (Besl & McKay 1992).

80 Since the limb is a rather simple surface, in order to map it onto a sphere, we used the geometrical distance between its  
 81 surface and a sphere that circumscribes it (Figure 2A top-left). Along a given radius  $r_j$ , we measured the corresponding  
 82 distance  $d_j$  between a given surface  $\mathbf{v} = (x, y, z)$  and the sphere. We used 500 radii along which computing these  
 83 distances creating a set of 500 scalars  $\mathbf{d}$  for each limb. On top on each sphere we obtain therefore a collection of sample  
 84 points (equal to the number of radii) to which is associated a set of scalars  $\mathbf{d}$  representing the distances between these  
 85 points and the surface, as shown by the color heat-map in Figure 2A (top-right). Moreover, the number of these sample  
 86 points provides the resolution of the spherical mapping of the considered surfaces. Given the total number of limb  
 87 surfaces  $N$  we have therefore a set of scalars  $\mathbf{d}_0, \dots, \mathbf{d}_N$  which encodes the spherical mapping of each surface. Every  
 88 spherical mapping can then be expanded in spherical harmonics.

89 A surface  $\mathbf{v}$ , mapped as  $x(\vartheta, \varphi)$ ,  $y(\vartheta, \varphi)$ ,  $z(\vartheta, \varphi)$ , can be represented in the form:

$$\mathbf{v}(\vartheta, \varphi) = \sum_{l=0}^{\infty} \sum_{m=-l}^l \mathbf{c}_l^m Y_l^m(\vartheta, \varphi) \quad (1)$$

90 where:

$$Y_l^m(\vartheta, \varphi) = \sqrt{\frac{(2l+1)(l-m)!}{4\pi(l+m)!}} P_l^m(\cos \vartheta) e^{im\varphi}, \quad (2)$$

91  $P_l^m$  are the associated Legendre polynomials and  $\mathbf{c}_l^m = (c_{lx}^m, c_{ly}^m, c_{lz}^m)$ , with  $l = [0, \infty)$  and  $m = [-l, +l]$ , are the  
 92 coefficients of the expansion. In particular,  $\mathbf{c}_l^m$  assume the form:

$$\mathbf{c}_l^m = \begin{matrix} c_0^0 \\ c_1^{-1} & c_1^0 & c_1^1 \\ c_2^{-2} & c_2^{-1} & c_2^0 & c_2^1 & c_2^2 \\ \dots \end{matrix} \quad (3)$$

93 In the practical use, the coefficients  $\mathbf{c}_l^m$  of the expansion are truncated to a specific order  $l = l_{\max}$  which defines the  
 94 level of detail. Spherical harmonic expansion provides a unique description of a surface based on scalar coefficients.

95 Using only the coefficients of the first orders (i.e.  $l_{\max} = 0, 1$ ) provides as a result practically a sphere, with  $l_{\max} = 3$   
96 the details of the reconstruction increase and adding more orders ( $l_{\max} \geq 7$ ) it is possible to obtain a limb-like  
97 surface (Figure 2A bottom). Moreover, the higher the order of the coefficient the less information it provides to the  
98 representation (i.e. in this reconstruction we are not interested in the finer morphological details). Therefore, every  
99 surface in our data set could be represented by a finite set of coefficients of its corresponding spherical harmonic  
100 expansion. This means that we have the coefficients for each surfaces at its corresponding point in time. If we put  
101 together and represent all the coefficients of e.g. order zero we will have a set of scalars evolving in time (Figure 2B  
102 left), and the same happens for the subsequent orders (Figure 2B right). Instead of reconstructing each surface using the  
103 exact coefficients we interpolated through them and used the interpolated values for the reconstruction (Figure 2C).  
104 In this way, the interpolated curve will give an average of the coefficients in the time points in which we have more  
105 than one surface and also will fill the time gaps in the points in which there are no data. Using this approach for the  
106 coefficients of all orders considered (i.e.  $l_{\max} = 25$ ) it is possible to obtain a reconstruction in space and time of the  
107 data set. In this reconstruction each limb contributes the same to the average growing shape.

108 As a further improvement, we used this reconstruction to refine the alignment of the original data-set obtaining  
109 a better and more precise sequence of limbs (Figure 2C top). Reapplying the method explained above in a way  
110 analogous to a bootstrapping process. With the new alignment of the data we obtain an improved reconstruction  
111 of a growing limb bud trajectory (Figure 2C bottom). To our knowledge this is the first data-driven 4D description  
112 of limb bud development across time and space (the result can only be well-appreciated from watching Movie 1 -  
113 <https://vedo.embl.es/fearless/#/limb>).

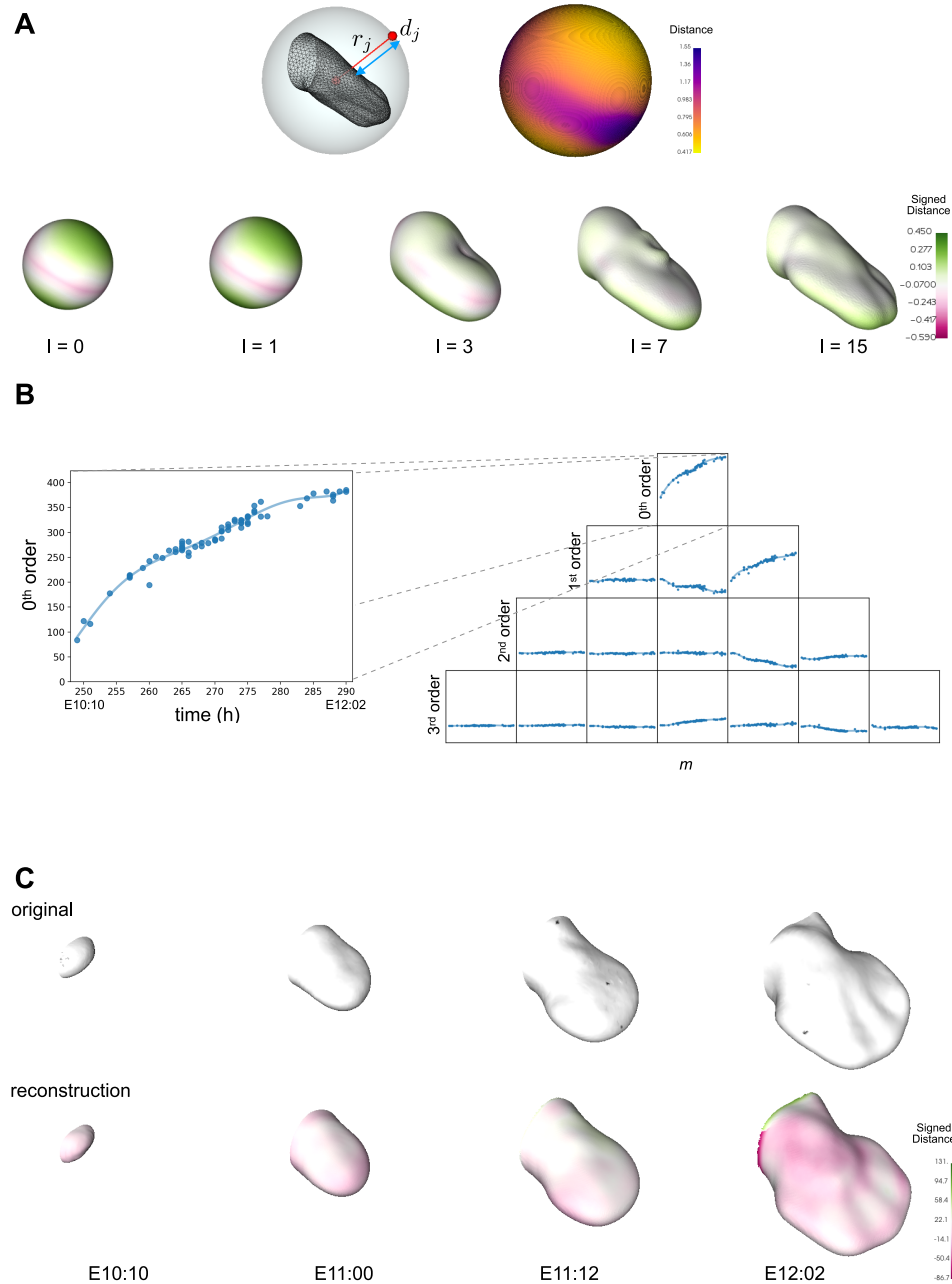

**Figure 2:** **A** - Mapping of a limb onto a sphere using geometrical distances ( $d$ ) along the radii ( $r$ ) between its surface and the sphere that circumscribes it (top-left). Spherical mapping of a limb, the heat-map shows the distance between the points on top of the sphere and the surface of the limb (top-right). Representation of the limb using spherical harmonic expansion of different orders,  $l_{\max} = 0, 1, 3, 7, 15$  (bottom), color map represents the distance between the reconstruction and the original surface. **B** - Splining in time over the spherical harmonics coefficients  $c_l^m$ . Here the first fourth orders are shown. **C** - Comparison of original data (top) at four different developmental stages (E10:10, E11:00, E11:12, E12:02) with the corresponding limb growth reconstruction (bottom), color map represents the signed distance between the reconstruction and the original surface.

### 114 2.1.1 Adding the limb flank

115 In 2.1 we were able to recreate the growth in space and time of a mouse limb. In reality however, the boundary between  
116 the limb and the rest of the embryo is rather arbitrary, and we therefore wanted to extend the analysis to include the  
117 flank of the embryo. Specifically, we extended the limb bud shape up to the mid-line of the mouse, as defined by the  
118 spinal column (Figure 3A). The new shape is now much more complex than before, displaying concavities (between the  
119 limb and the flank), and the spherical mapping described above is no longer applicable. Mapping methods for more  
120 complex surfaces and volumes have been extensively investigated (Brechtbuhler et al. 1995, Shen & Makedon 2006, Lai  
121 et al. 2009, Shen et al. 2009, Yu et al. 2010), but nevertheless these proposed methods are not suitable when multiple  
122 objects need to be consistently mapped onto the same reference since e.g. the portion of the sphere of the first one may  
123 not represent the same part of the second object.

124 To map our complex embryonic surface onto a sphere, we chose to make use of volumetric data. For any arbitrary  
125 surface it is possible to embed it into a volume and to compute the signed distances over this volume from the input  
126 mesh (Bærentzen & Aanæs 2005). The output is a volumetric dataset whose voxels contain the signed distance from  
127 the mesh. Inscribing this volume into a set of concentric spheres allow us to generate a set of scalar fields (i.e. signed  
128 distances) on the sphere surface (Kazhdan et al. 2003, Skibbe et al. 2009). This allows us to expand the scalars of each  
129 sphere into spherical harmonics. In this way we are able to have a spherical harmonic representation for any kind of  
130 surfaces. It is now possible to apply this procedure on the same data set described before but we can now consider not  
131 only the limb but also the flank (i.e. part of the mouse back) since we do not have any limitation on the kind of surface  
132 to be analysed. Consequently, we can adopt the same concept used before of interpolating the spherical harmonics  
133 coefficients in time (over the developmental stages).

134 For a variety of reasons (external forces, natural variation, etc.) the limb buds of two embryos of the exact same age  
135 may not protrude from the flank at the same angle. But a reasonable average shape cannot be calculated from two  
136 images that do not align. To create a reliable average trajectory of normal development we need to make a judgement of  
137 which angle is the most normal, and we must then either select images that fit this average, or alter the remaining data  
138 sets so that all limb buds and all flank regions can be well-aligned. The first step was to measure the correct average  
139 angle. By defining an orthogonal triad of vectors  $\mathbf{V} = (\vec{c}\vec{p}, \vec{w}, \vec{v})$  it is possible to describe the movements and rotations  
140 of the limb in space. Moreover, considering a plane perpendicular to the limb, and therefore parallel to the flank, we  
141 can compute the angles between the triad  $\mathbf{V}$  and a normal  $\vec{N}$  to this plane (Figure 3A). Specifically,  $\alpha = \angle(\vec{c}\vec{p}, \vec{N})$   
142 describes the vertical bending of the limb with respect to the flank and thus we can plot the angles for many embryos  
143 over time, which reveals a fairly linear decrease in this angle from about 90 degrees at mE10:10 to about 40 degrees  
144 at mE12:02 (Figure 3B). The second step was therefore to use a linear fit of  $\alpha$  as a reference, and to apply a bending  
145 transform onto the shape data using *thin plate splines* (Bookstein 1989), which is a non-linear transformation based on  
146 a physical analogy involving the bending of a rigid material. The limbs were not affected by this transformation, only  
147 the non aligned flanks were bent. This operation ensures that all data-sets reflect the average bending trajectory over  
148 time (Figure 3C).

149 To implement the idea mentioned above, we embedded each surface into a volume and computed the signed distances  
150 over this volume from the input mesh (Bærentzen & Aanæs 2005). The output is a volumetric dataset whose voxels  
151 contain the signed distance from the mesh. It is therefore possible to generate a scalar field by the signed distance  
152 from a mesh. Inscribing this volume into a sphere it is possible to know the intensity of the signed distance (SD) along  
153 each chosen radius ( $r_0, r_1, \dots, r_n$ ) of this sphere making this mapping method theoretically applicable to any arbitrary  
154 surface (Figure 3D). Since each radius is discretized in  $m = 50$  points, we have a set of  $m$  concentric spheres on which  
155 the signed distances are grouped according to their position along each radius. This represent a suitable condition that  
156 allows us to expand the scalars of each sphere into spherical harmonics.

157 With this mapping method, we obtained the  $c_l^m$  coefficients for each concentric spheres of every limb. Similar as in 2.1,  
158 instead of reconstructing each volume using the exact coefficients  $c_l^m$  we first interpolated them over time. Subsequently  
159 we used for the reconstruction the values of the interpolation, obtaining in this way one new limb for every time point  
160 (Figure 3E).

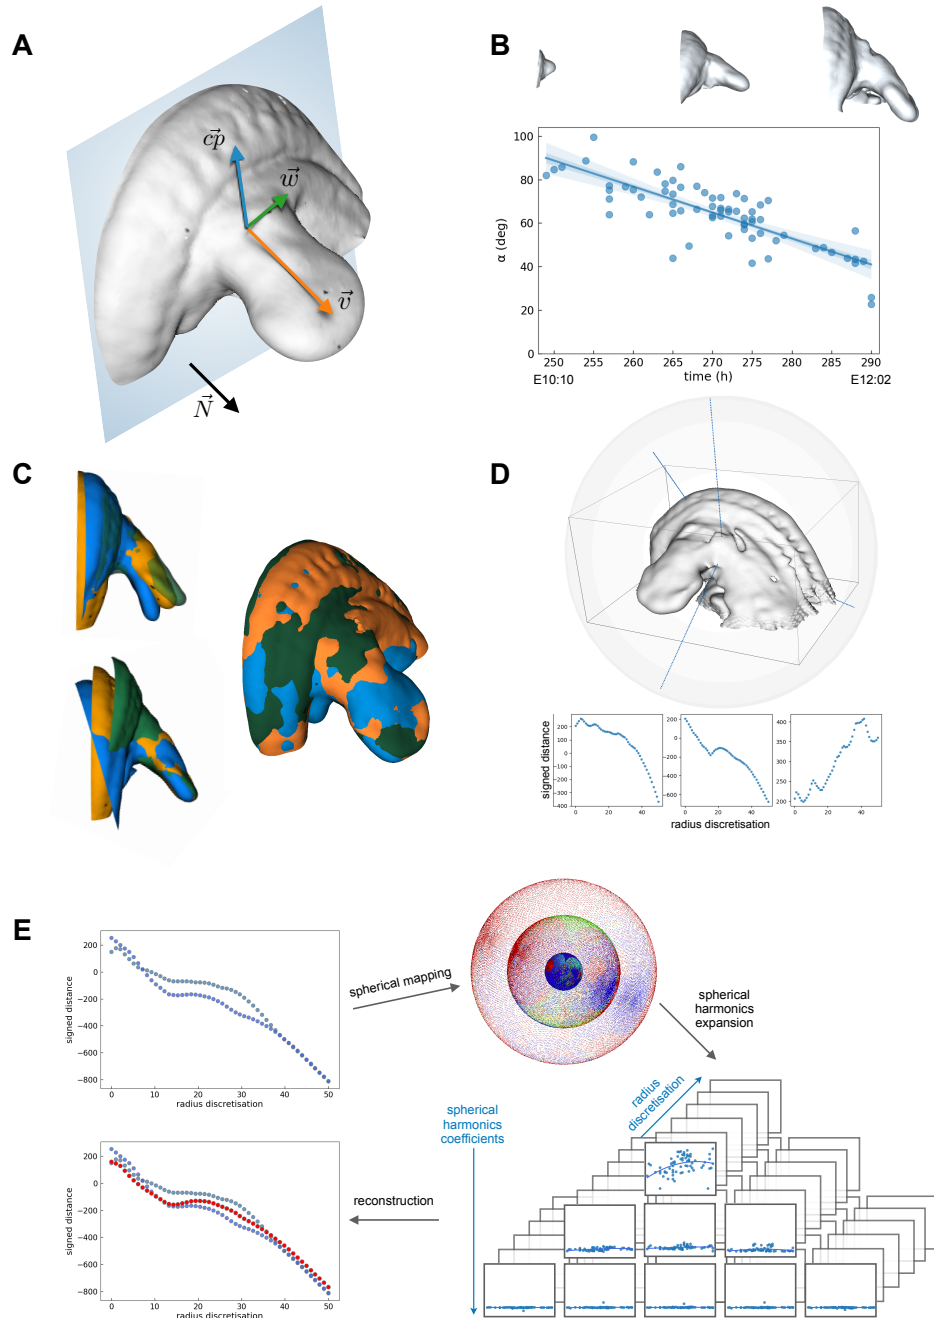

**Figure 3:** **A** - Triad ( $\vec{c\bar{p}}$ ,  $\vec{w}$ ,  $\vec{v}$ ) describing the orientations of the limb with respect to the normal  $\vec{N}$  to a perpendicular plane. **B** - Variation in time of  $\alpha = \angle(\vec{c\bar{p}}, \vec{N})$  and its corresponding linear fitting with three representative limbs - E10:10, E11:25, E12:02 (top). **C** - Alignment of three limbs with flank of the same developmental stage according to the flanks (top left) and the limbs (bottom left), alignment according to the limbs and warping of the flanks (right). **D** - Example of signed distances computed on three different radii of a limb. **E** - Example of signed distance computed on the same radius of two limbs at the same developmental stage, their spherical mapping, first three order coefficients of the spherical harmonics expansion, and comparison of the signed distance reconstruction (red dots) with the original ones (blue dots).

161 Every new limb is a volume object in which each voxel contains a scalar representing the reconstructed signed distance.  
 162 From this volume is possible to additionally extract a corresponding surface. Using this method we were able to create  
 163 a time-course reconstruction of more complex object like a mouse limb with its corresponding flank (Figure 4A).



164 The reconstruction in space and time of the growing limb consists of a smooth trajectory in developmental stages  
165 starting from E10:09 up to E12:02 (Figure 4A, Movie 2 - <https://vedo.embl.es/fearless/#/limbflank>). In  
166 order to know how accurately the result reproduces the 4D growth of a mouse limb, we directly compared it with the real  
167 data. To do so, we compared three distinctive characteristics of a mouse limb. Specifically, the total growth in volume  
168 of the limb, its elongation along the proximodistal (PD) axis and its widening along the anteroposterior (AP) axis  
169 (Figure 4B). For each reconstructed shape of a limb with its flank, the total volume was computed and compared with  
170 the volume of the original data at the same developmental stage (Figure 4C). In order to compare the limb elongation  
171 along the PD axis, we computed the geometrical distance between a fixed point (i.e.  $[0, 0, 0]$ ) and the most distal point  
172 of the limb (Figure 4B) and we compared this value in the reconstructed and original data (Figure 4D). For confronting  
173 the enlargement of the limb along the AP axis the geometrical distance between the two furthest points in the AP plane  
174 of the limb “paddle” was determined and compared (Figure 4E).

175 The result represents the 4D-growth of an *ideal* limb which averages the common characteristics and features of all  
176 the limbs in the data set. In particular, we are recreating the growing process starting from when the limb bud is just a  
177 small bump of tissue (E10:09) and finishing when it already shows a distinctive “paddle” shape of the autopod (E12:02).  
178 Additionally, the reconstruction is able to capture the correct biological scaling of a growing limb by accurately  
179 reproducing the volume growth shown in the data and its proximodistal (PD) and anteroposterior (AP) axes evolution.

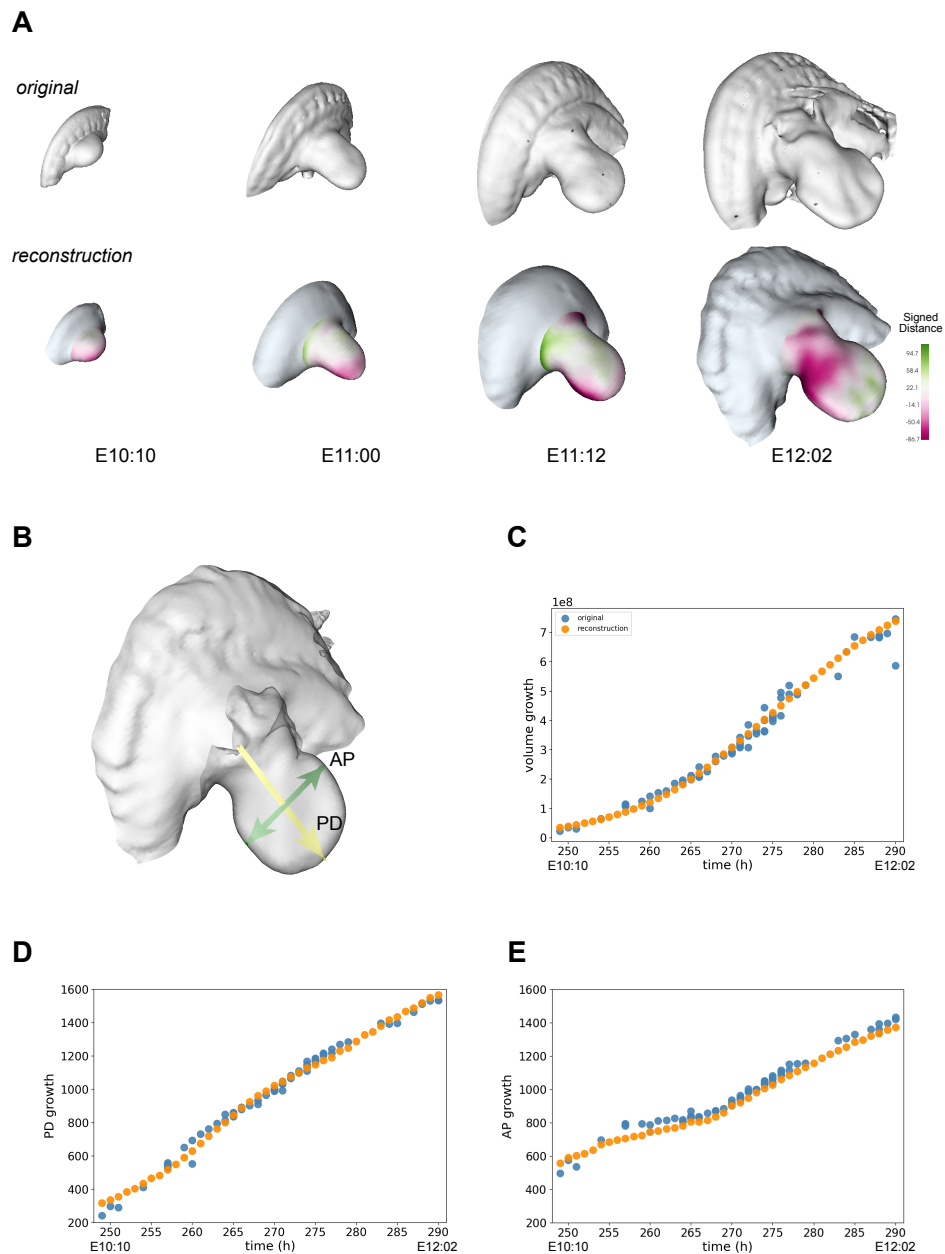

**Figure 4:** **A** - Comparison of original data (on top) at four different developmental stages (E10:10, E11:00, E11:12, E12:02) with the corresponding limb growth reconstructions (bottom), color map representing the signed distance between the reconstruction and the original surface. **B** - Representation of the proximodistal (PD) and anteroposterior (AP) axes of a limb. **C** - Volume growth comparison between original data (blue dots) and reconstructed shapes (orange dots). **D** - PD growth comparison between original data (blue dots) and reconstructed shapes (orange dots). **E** - AP growth comparison between original data (blue dots) and reconstructed shapes (orange dots).

## 180 2.2 Application to the heart development

181 In order to determine the robustness of the method we applied it on a completely different set of data, specifically  
 182 volumetric mouse heart data. We used a total of 26 OPT scans of mouse embryos where the heart is distinguished

183 from the rest of the embryonic tissue by means of a molecular marker (myosin heavy chain MHC, as detected by  
184 antibody staining). The embryos were scanned by OPT and then processed to create surfaces representing only the  
185 MHC expressing part of the heart (Figure 5A). We obtained mouse heart data at six different developmental stages, i.e.  
186 10, 14, 18-19, 21-22, 24-25 and 28-29 somites (Figure 5B).

187 In this specific case, we considered the heart as a whole organ without the necessity of bending its surface. Therefore,  
188 differently from 2.1.1 it was possible to apply the method previously described directly on the volumetric data without  
189 the requirement of first converting them to surfaces and then using the signed distance.

190 As first step, all the data were manually aligned using a 4x4 linear transformation. Afterwards, similarly to 2.1.1, each  
191 heart was embed into a sphere centered at the geometric center of the object and the scalars, representing the voxel  
192 intensities, were computed along the radii of the sphere. The result is a set of intensities mapped on every concentric  
193 sphere from the radius discretisation (Figure 5C). The scalar values mapped on these spheres were expanded into  
194 spherical harmonics. The coefficients  $c_l^m$  of the spherical harmonics were then interpolated over the developmental  
195 stages and these interpolated values were used to reconstruct the heart trajectory.

196 The results, as in the case of the mouse limbs (2.1.1), is a smooth trajectory of a growing heart in space and time that  
197 takes into account the common characteristics and properties of all the samples in the data set (Figure 5D, Movie 3  
198 - <https://vedo.embl.es/fearless/#/heart>). Thus, in spite of the fact that mouse limbs and mouse hearts are  
199 markedly different in shape, our algorithm demonstrates to be completely general and to produce in both cases a reliable  
200 reconstruction of the evolution in space and time of the original data. Moreover, this approach, not only provides a  
201 quantitative basis for validating predictive models but it also increases our understanding of morphogenetic processes  
202 from a purely geometrical point of view.

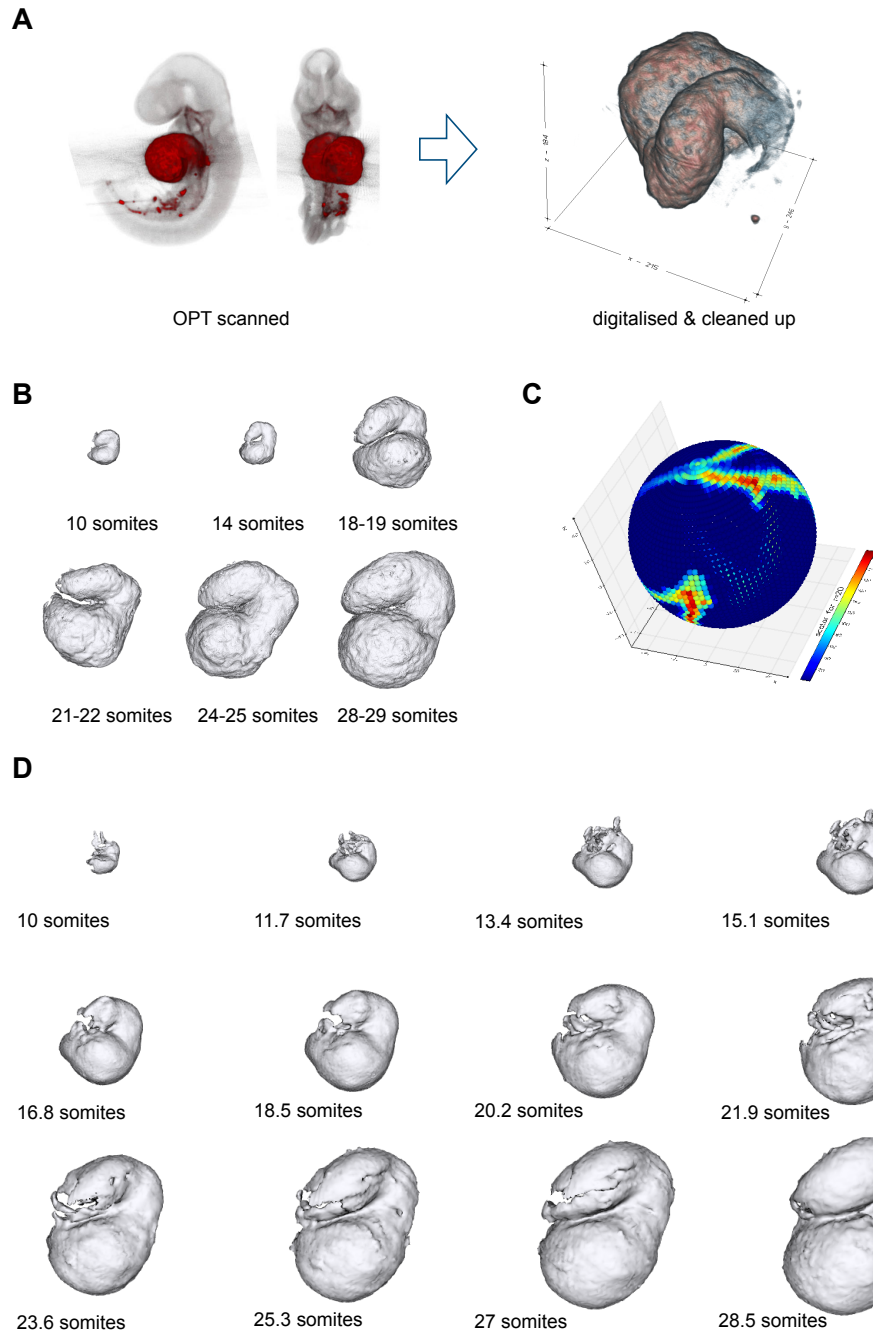

**Figure 5:** **A** - Representation of the data acquisition procedure: OPT scans of molecular marked mouse embryos, digitalisation and cleaning of the data. **B** - Examples of heart volumetric data at different developmental stages (i.e. 10, 14, 18-19, 21-22, 24-25 and 28-29 somites). **C** - Examples of scalar values of an 18-19 heart on one specific radius shell. Colors represent voxel intensities. **D** - The heart reconstruction at different developmental time points.

### 203 3 Discussion

204 Our understanding of limb development (and other examples of organogenesis) has been driven by a strong focus  
205 on molecular and cellular activities. While modern biology has striven to make measurements of molecular data  
206 increasingly quantitative and complete (such as transcriptomics, and single-cell approaches), surprisingly, an accurate  
207 quantitative description of the continuously changing morphology of the limb has not been created. Precision in such

208 a description has perhaps not previously been required for a basic appreciation of mutant phenotypes, but as biology  
209 becomes more predictive and quantitative, accurate measurements of dynamic morphology will be essential. For  
210 example, the value of quantification for static 3D limb bud shape has already been shown to increase sensitivity in  
211 phenotyping studies (Martínez-Abadías et al. 2018), as well as enabling the detection of subtle but real alterations  
212 in gene expression patterns. Quantifying dynamic shape changes will also become important for mechanistic and  
213 predictive models of morphogenesis. For example, we previously used data-driven finite element modelling (FEM)  
214 to rule out a popular hypothesis about limb bud elongation (Boehm et al. 2010). By combing quantification of the  
215 changing 3D shape with accurate measurements of proliferation, we were able show that the proliferation gradient  
216 hypothesis cannot be correct, because the model's predictions do not fit the true morphology.

217 While for some model species a 4D quantitative trajectory can be captured by direct time-lapse imaging, this is not  
218 true for mammalian organs. In utero imaging cannot provide high spatial resolution, and in vitro culture techniques do  
219 not support normal organogenesis. We are therefore left with the challenge of reconstructing a 4D dynamic process,  
220 from static snapshots. Here we have developed and demonstrated a method to perform this task. It is based on the  
221 mathematical technique of spherical harmonics, which is a convenient method for dimensionality reduction of data  
222 that can be spatially distributed on a sphere. We were able to use the coefficients of the spherical harmonics from 69  
223 different limb buds, spanning an age range of mE10:09 to mE12:02, and spline through these values to create the first  
224 smooth continuous 4D trajectory of normal mouse limb development. A simple, direct spherical harmonics method  
225 worked well on images just containing the limb bud itself, while a more complex volumetric version was required  
226 to interpolate a larger region of tissue that contained concavities (images which included a significant portion of the  
227 embryo trunk as well). A challenge for traditional landmark-based approaches, such as geometric morphometrics,  
228 is that the shape complexity dramatically increases from the beginning to the end of the trajectory, in other words  
229 presenting a changing amount of useful shape information. The spherical harmonics approach we present here copes  
230 well with this challenge, because of the intrinsic feature that coefficients of different orders (different levels of detail)  
231 contribute independently to the overall shape description.

232 In conclusion, we have applied this method to both limb development and heart development (the MHC expressing  
233 tissues) for the mouse embryo. It produces for the first time, a smooth, continuous and quantitative 4D description of  
234 their morphogenesis, including predictions for the gradual changes in lengths, and volumes of the tissue. We believe it  
235 can be applied to many other developing organs, and will be increasingly important as developmental biology becomes  
236 a more quantitative science, and moves towards predictive mechanistic computer modelling of morphogenesis.

## 237 **Methods**

### 238 **Animals**

239 All animal work was performed according to the guidelines of the Committees on Ethics and Animal Welfare established  
240 at PRBB and CNIC, in accordance to Spanish and European laws. C57B16/J mouse embryos were collected at the  
241 indicated gestational stages. For a precise staging of limb buds, the eMOSS staging system was used (Musy et al.  
242 2018), and for hearts, pairs of somites were counted. Embryos were dissected in cold PBS and fixed overnight in 4%  
243 PFA at 4°C.

### 244 **Whole-mount antibody staining**

245 Embryos were dehydrated with methanol and left overnight at -20°C. Whole-mount immunocytochemistry was performed  
246 according to standard protocols. Embryos were rehydrated, permeabilized in PBS plus 0.5% Triton X-100 (Sigma), left  
247 2h in blocking solution (90% PBST (0.1% Triton X-100 in PBS)/10% normal goat serum) and incubated overnight  
248 at 4°C with anti-Myosin heavy chain, sarcomere (MHC) antibody (Developmental Studies Hybridoma Bank, MF20;  
249 1:10). Embryos were washed in PBST four times for 4 hours and incubated overnight with biotin goat anti-mouse IgG  
250 (Jackson ImmunoResearch ref. 115-066-071; 1:500) and then with streptavidin-Cy3 (Jackson ImmunoResearch ref.  
251 016-160-084; 1:500). After washing in PBST four times for four hours, embryos were stored in PBST 0.01% sodium  
252 azide and subjected to OPT scanning to obtain images.

### 253 **Optical projection tomography**

254 Optical projection tomography (OPT) imaging (Sharpe et al. 2002) was used to acquire 2D images and obtain 3D  
255 reconstructions. MF20 immunostained samples were embedded in 1% low melting point agarose (Sigma), dehydrated  
256 in 100% methanol and cleared in BABB (1 volume benzyl alcohol : 2 volumes benzyl benzoate). Samples were scanned  
257 at intermediate resolution (512x512 pixels) in the Bioptronics OPT scanner using Skyscan software (Bioptronics, MRC  
258 Technology). The GFP filter (425/40nm, 475nm LP) was used to scan whole embryo anatomy, while the Cy3 filter

259 (545/30nm, 610/75nm) was used to image the heart. OPT scans were reconstructed using NRecon software (SkyScan)  
260 and analyzed using the Bioptonics Viewer software.

## 261 **Implementation**

262 The method is written in Python 3 and depends on standard python packages (Harris et al. 2020). All the mouse  
263 embryos were staged using the embryonic Mouse Ontogenetic Staging System (eMOSS) (Musy et al. 2018). Surfaces  
264 of the data were extracted from the OPT scans using the marching cubes algorithm (Lorenson & Cline 1987). The  
265 alignment in space of the mouse limbs was done using the reference provided by eMOSS and refined with the  
266 iterative closest point (ICP) algorithm (Besl & McKay 1992). Spherical harmonics transforms were made through the  
267 SHTools library (Wieczorek & Meschede 2018). The comparison between the reconstructed limbs and the original  
268 data was computed applying the signed distance using the angle weighted pseudonormal (Barentzen & Aanæs 2005)  
269 implemented in *Vedo* (Musy et al. 2019). The bending of the flanks to make them match with the reference limbs was  
270 done by using a linear fit of  $\alpha$  as a reference, and to apply a bending transform onto the shape data using *thin plate*  
271 *splines* (Bookstein 1989) (implemented in *Vedo* (Musy et al. 2019)), which is a non-linear transformation based on a  
272 physical analogy involving the bending of a rigid material. The limbs were not affected by this transformation, only the  
273 non aligned flanks were bent. All the visualisations and animations were produced using *Vedo* (Musy et al. 2019).

274 All the code is open-source and has been deposited in full in the GitHub repository → <https://github.com/gioda/4D-reconstruction-of-developmental-trajectories-using-spherical-harmonics>.  
275

276 Additional movies, 3D interactive views of the results and further information can be found in the project's web-page  
277 → <https://vedo.embl.es/fearless>.

## 278 **Acknowledgments**

279 We thank Isaac Esteban and Miguel Torres for their invaluable discussions on shape comparison and spherical harmonics;  
280 Antoni Matyjaszkiewicz for his help with the web-page of the project. This research was supported by core funding  
281 from EMBL and CRG, and also the ERC Advanced grant SIMBIONT (project no. 670555) and a grant from the  
282 Fundacion La Marato TV3 (grant 082030). GD and MM were supported by the ERC Advanced grant SIMBIONT  
283 (project no. 670555).

## 284 **Author Contributions**

285 GD: Conceptualization, Data curation, Formal analysis, Investigation, Methodology, Writing – original draft; MM:  
286 Investigation, Methodology, Writing – review and editing; MN, ARM, CBC: Performed the experiments; JSE Super-  
287 vision, Funding acquisition, Writing – review and editing; JS Conceptualization, Supervision, Funding acquisition,  
288 Project administration, Writing – review and editing.

## 289 **Declaration of Interests**

290 The authors declare no competing interests.

## 291 References

- 292 Bærentzen, J. A. & Aanæs, H. (2005), ‘Signed distance computation using the angle weighted pseudonormal’, *IEEE*  
293 *Transactions on Visualization and Computer Graphics* **11**(3), 243–253.  
294 **URL:** <http://ieeexplore.ieee.org/document/1407857/>
- 295 Besl, P. & McKay, N. (1992), ‘A Method for Registration of 3-D Shapes’, *IEEE Transactions on Pattern Analysis and*  
296 *Machine Intelligence* **14**(2), 239–256.
- 297 Boehm, B., Westerberg, H., Lesnicar-Pucko, G., Raja, S., Rautschka, M., Cotterell, J., Swoger, J. & Sharpe, J. (2010),  
298 ‘The role of spatially controlled cell proliferation in limb bud morphogenesis’, *PLoS Biology* **8**(7).  
299 **URL:** <https://journals.plos.org/plosbiology/article?id=10.1371/journal.pbio.1000420>
- 300 Bookstein, F. L. (1989), ‘Principal Warps: Thin-Plate Splines and the Decomposition of Deformations’, *IEEE Transac-*  
301 *tions on Pattern Analysis and Machine Intelligence* **11**(6), 567–585.
- 302 Brechbuhler, C., Gerig, G. & Kubler, O. (1995), ‘Parametrization of closed surfaces for 3-D shape description’,  
303 *Computer Vision and Image Understanding* **61**(2), 154–170.
- 304 Harris, C. R., Millman, K. J., van der Walt, S. J., Gommers, R., Virtanen, P., Cournapeau, D., Wieser, E., Taylor, J.,  
305 Berg, S., Smith, N. J., Kern, R., Picus, M., Hoyer, S., van Kerkwijk, M. H., Brett, M., Haldane, A., del Río, J. F.,  
306 Wiebe, M., Peterson, P., Gérard-Marchant, P., Sheppard, K., Reddy, T., Weckesser, W., Abbasi, H., Gohlke, C. &  
307 Oliphant, T. E. (2020), ‘Array programming with NumPy’, *Nature* **585**(7825), 357–362.  
308 **URL:** <http://dx.doi.org/10.1038/s41586-020-2649-2>
- 309 Huiskens, J., Swoger, J., Del Bene, F., Wittbrodt, J. & Stelzer, E. H. (2004), ‘Optical sectioning deep inside live embryos  
310 by selective plane illumination microscopy’, *Science* **305**(5686), 1007–1009.
- 311 Kazhdan, M., Funkhouser, T. & Rusinkiewicz, S. (2003), Rotation invariant spherical harmonic representation of 3D  
312 shape descriptors, in ‘Symposium on Geometry Processing’.
- 313 Khairy, K., Lemon, W., Amat, F. & Keller, P. J. (2018), ‘A Preferred Curvature-Based Continuum Mechanics Framework  
314 for Modeling Embryogenesis’, *Biophysical Journal* **114**(2), 267–277.  
315 **URL:** <http://linkinghub.elsevier.com/retrieve/pii/S0006349517312444> <https://doi.org/10.1016/j.bpj.2017.11.015>
- 316 Lai, S., Cheng, F. & Fan, F. (2009), ‘Fast spherical mapping for genus-0 meshes’, *Lecture Notes in Computer Science*  
317 *(including subseries Lecture Notes in Artificial Intelligence and Lecture Notes in Bioinformatics)* **5876 LNCS**(PART  
318 2), 982–991.  
319 **URL:** <https://pdfs.semanticscholar.org/4f2a/e2bf99f1e78ae0e0ca0efb3bb60604cd93e1.pdf>
- 320 Lorensen, W. E. & Cline, H. E. (1987), ‘Marching cubes: A high resolution 3D surface construction algorithm’,  
321 *Computer Graphics (ACM)* **21**(4), 163–169.
- 322 Martínez-Abadías, N., Estivill, R. M., Tomas, J. S., Perrine, S. M., Yoon, M., Robert-Moreno, A., Swoger, J., Russo, L.,  
323 Kawasaki, K., Richtsmeier, J. & Sharpe, J. (2018), ‘Quantification of gene expression patterns to reveal the origins of  
324 abnormal morphogenesis’, *eLife* **7**.  
325 **URL:** <https://doi.org/10.7554/eLife.36405.001>
- 326 McDole, K., Guignard, L., Amat, F., Berger, A., Malandain, G., Royer, L. A., Turaga, S. C., Branson, K. & Keller, P. J.  
327 (2018), ‘In Toto Imaging and Reconstruction of Post-Implantation Mouse Development at the Single-Cell Level’,  
328 *Cell* **175**(3), 859–876.
- 329 Medyukhina, A., Blickensdorf, M., Cseresnyés, Z., Ruef, N., Stein, J. V. & Figge, M. T. (2020), ‘Dynamic spherical  
330 harmonics approach for shape classification of migrating cells’, *Scientific Reports* **10**(1), 1–12.  
331 **URL:** <https://www.nature.com/articles/s41598-020-62997-7>
- 332 Morishita, Y., Hironaka, K. I., Lee, S. W., Jin, T. & Ohtsuka, D. (2017), ‘Reconstructing 3D deformation dynamics for  
333 curved epithelial sheet morphogenesis from positional data of sparsely-labeled cells’, *Nature Communications* **8**(1).  
334 **URL:** <https://www.nature.com/articles/s41467-017-00023-7.pdf>
- 335 Musy, M., Dalmaso, G. & Sullivan, B. (2019), ‘vedo, a python module for scientific analysis and visualization of 3D  
336 objects and point clouds’.
- 337 Musy, M., Flaherty, K., Raspopovic, J., Robert-Moreno, A., Richtsmeier, J. & Sharpe, J. (2018), ‘A quantitative method  
338 for staging mouse embryos based on limb morphometry’, *Development* **145**(March), dev.154856.  
339 **URL:** <http://dev.biologists.org/lookup/doi/10.1242/dev.154856>
- 340 Royer, L. A., Lemon, W. C., Chhetri, R. K., Wan, Y., Coleman, M., Myers, E. W. & Keller, P. J. (2016), ‘Adaptive light-  
341 sheet microscopy for long-term, high-resolution imaging in living organisms’, *Nature Biotechnology* **34**(12), 1267–  
342 1278.

- 343 Sharpe, J., Ahlgren, U., Perry, P., Hill, B., Ross, A., Hecksher-Sørensen, J., Baldock, R. & Davidson, D. (2002), 'Optical  
344 projection tomography as a tool for 3D microscopy and gene expression studies', *Science* **296**(5567), 541–545.  
345 **URL:** <http://www.ncbi.nlm.nih.gov/pubmed/11964482>
- 346 Shen, L., Farid, H. & Mcpeek, M. A. (2009), 'Modeling three-dimensional morphological structures using spherical  
347 harmonics', *Evolution* **63**(4), 1003–1016.  
348 **URL:** <https://onlinelibrary.wiley.com/doi/pdf/10.1111/j.1558-5646.2008.00557.x>
- 349 Shen, L. & Makedon, F. (2006), 'Spherical mapping for processing of 3D closed surfaces', *Image and Vision Computing*  
350 **24**(7), 743–761.  
351 **URL:** <https://linkinghub.elsevier.com/retrieve/pii/S0262885606000485>
- 352 Skibbe, H., Wang, Q., Ronneberger, O., Burkhardt, H. & Reiser, M. (2009), 'Fast computation of 3D spherical  
353 Fourier harmonic descriptors - A complete orthonormal basis for a rotational invariant representation of three-  
354 dimensional objects', *2009 IEEE 12th International Conference on Computer Vision Workshops, ICCV Workshops*  
355 *2009* pp. 1863–1869.
- 356 Styner, M., Oguz, I. & Xu, S. (2006), 'Framework for the statistical shape analysis of brain structures using SPHARM-  
357 PDM', *Insight Journal* **m**(1071), 242–250.  
358 **URL:** <http://www.ncbi.nlm.nih.gov/pmc/articles/PMC3062073/>
- 359 Tomer, R., Khairy, K., Amat, F. & Keller, P. J. (2012), 'Quantitative high-speed imaging of entire developing embryos  
360 with simultaneous multiview light-sheet microscopy', *Nature Methods* **9**(7), 755–763.
- 361 Wiczorek, M. A. & Meschede, M. (2018), 'SHTools: Tools for Working with Spherical Harmonics', *Geochemistry,*  
362 *Geophysics, Geosystems* **19**(8), 2574–2592.
- 363 Wong, M. D., Dorr, A. E., Walls, J. R., Lerch, J. P. & Mark Henkelman, R. (2012), 'A novel 3D mouse embryo atlas  
364 based on micro-CT', *Development (Cambridge)* **139**(17), 3248–3256.
- 365 Wong, M. D., Maezawa, Y., Lerch, J. P. & Mark Henkelman, R. (2014), 'Automated pipeline for anatomical phenotyping  
366 of mouse embryos using micro-CT', *Development (Cambridge)* **141**(12), 2533–2541.
- 367 Wong, M. D., Van Eede, M. C., Spring, S., Jevtic, S., Boughner, J. C., Lerch, J. P. & Mark Henkelman, R. (2015), '4D  
368 Atlas of the Mouse Embryo for Precise Morphological Staging', *Development (Cambridge)* **142**(20), 3583–3591.
- 369 Yu, W., Ye, T., Li, M. & Li, X. (2010), 'Spherical harmonic decomposition for surfaces of arbitrary topology', *ICCSE*  
370 *2010 - 5th International Conference on Computer Science and Education, Final Program and Book of Abstracts*  
371 pp. 215–220.
